# Supplementary material
Source: Springer Nature journal article supplement (https://www.springermedizin.de/resource/supplementary/12960_2009_212_MOESM2_ESM.pdf/9570674)
Supplement: MOESM2 [file 9570674]

# Managers Who Lead

## Leading

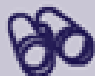

Scan

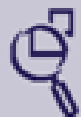

Focus

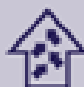

Align/  
Mobilize

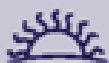

Inspire

## Managing

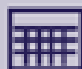

Plan

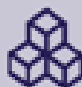

Organize

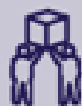

Implement

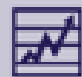

Monitor  
& Evaluate
